# Supplementary material for: Osteogenic Activity of Lupeol Isolated from Clinacanthus nutans Lindau: Activity and Mode of Action
Source: Hindawi journal article supplement (doi:10.1155/2021/6704999), 2021-09-21
Supplement: f1 [file 6704999.f1.zip]

Archive with 3 entries (3 files):
- 6704999.f1/~$PPLEMENTARY MATERIALS-JOC-6704999-Processing.docx
- 6704999.f1/Front Page-JOC- 6704999-Processing.docx
- 6704999.f1/SUPPLEMENTARY MATERIALS-JOC-6704999-Processing.docx
