# Supplementary material for: Osteogenic Activity of Lupeol Isolated from Clinacanthus nutans Lindau: Activity and Mode of Action
Source: Hindawi journal article supplement (doi:10.1155/2021/6704999), 2021-09-21
Supplement: f1 [file 6704999.f1.zip › 6704999.f1/Front Page-JOC- 6704999-Processing.docx]

**Osteogenic activity of lupeol isolated from *Clinacanthus nutans* Lindau:**

**activity and mode of action**

Minh T.H. Nguyen1*, Quang V. Ngo2, Huyen T. T. Nguyen1, Quan M. Pham3,7, Trang H. Dinh1, Huong T.T. Nguyen4, Nguyen V. Tinh5, and Phuong T.M. Nguyen6,7*

1University of Science and Technology of Hanoi, Vietnam Academy of Science and Technology, 18 Hoang Quoc Viet Road, Hanoi, Vietnam

2Institute of Chemistry, Vietnam Academy of Science and Technology, 18 Hoang Quoc Viet Road, Hanoi, Vietnam

3Institute of Natural products chemistry, Vietnam Academy of Science and Technology, 18 Hoang Quoc Viet Road, Hanoi, Vietnam

*4Institute of Ecology and Biological Resources, Vietnam Academy of Science and Technology, 18 Hoang Quoc Viet Road, Hanoi, Vietnam*

5*Vinmec Research Institute of Stem Cell and Gene Technology, 458 Minh Khai Street, Vinh Tuy, Hai Ba Trung, Hanoi,Vietnam*

6Institute of Biotechnology, Vietnam Academy of Science and Technology, 18 Hoang Quoc Viet Road, Hanoi, Vietnam.

7Graduate University of Science and Technology, Vietnam Academy of Science and Technology, 18 Hoang Quoc Viet Road, Hanoi, Vietnam.

*Corresponding author email address: [*phuongnguyenibt@gmail.com*](mailto:phuongnguyenibt@gmail.com)
