# Supplementary material for: Osteogenic Activity of Lupeol Isolated from Clinacanthus nutans Lindau: Activity and Mode of Action
Source: Hindawi journal article supplement (doi:10.1155/2021/6704999), 2021-09-21
Supplement: f1 [file 6704999.f1.zip › 6704999.f1/SUPPLEMENTARY MATERIALS-JOC-6704999-Processing.docx]

**SUPPEMENTARY MATERIALS**

**F2.0**

**(1-50)**

**F2.3**

**(94-122)**

**Ethyl acetate extract**

**F 1.2 (27-44)**

**F2.2**

**(64-73)**

**F2.1**

**(52-60)**

***n-hexane:acetone (5:1)***

***n-hexane:ethyl acetate (7:1)***

***Silica gel CC 1***

***Silica gel CC 2***

**Lupeol**

***Re-crystalization***

**Figure S1.** Flow chart for isolation of lupeol from *C. nutans.*


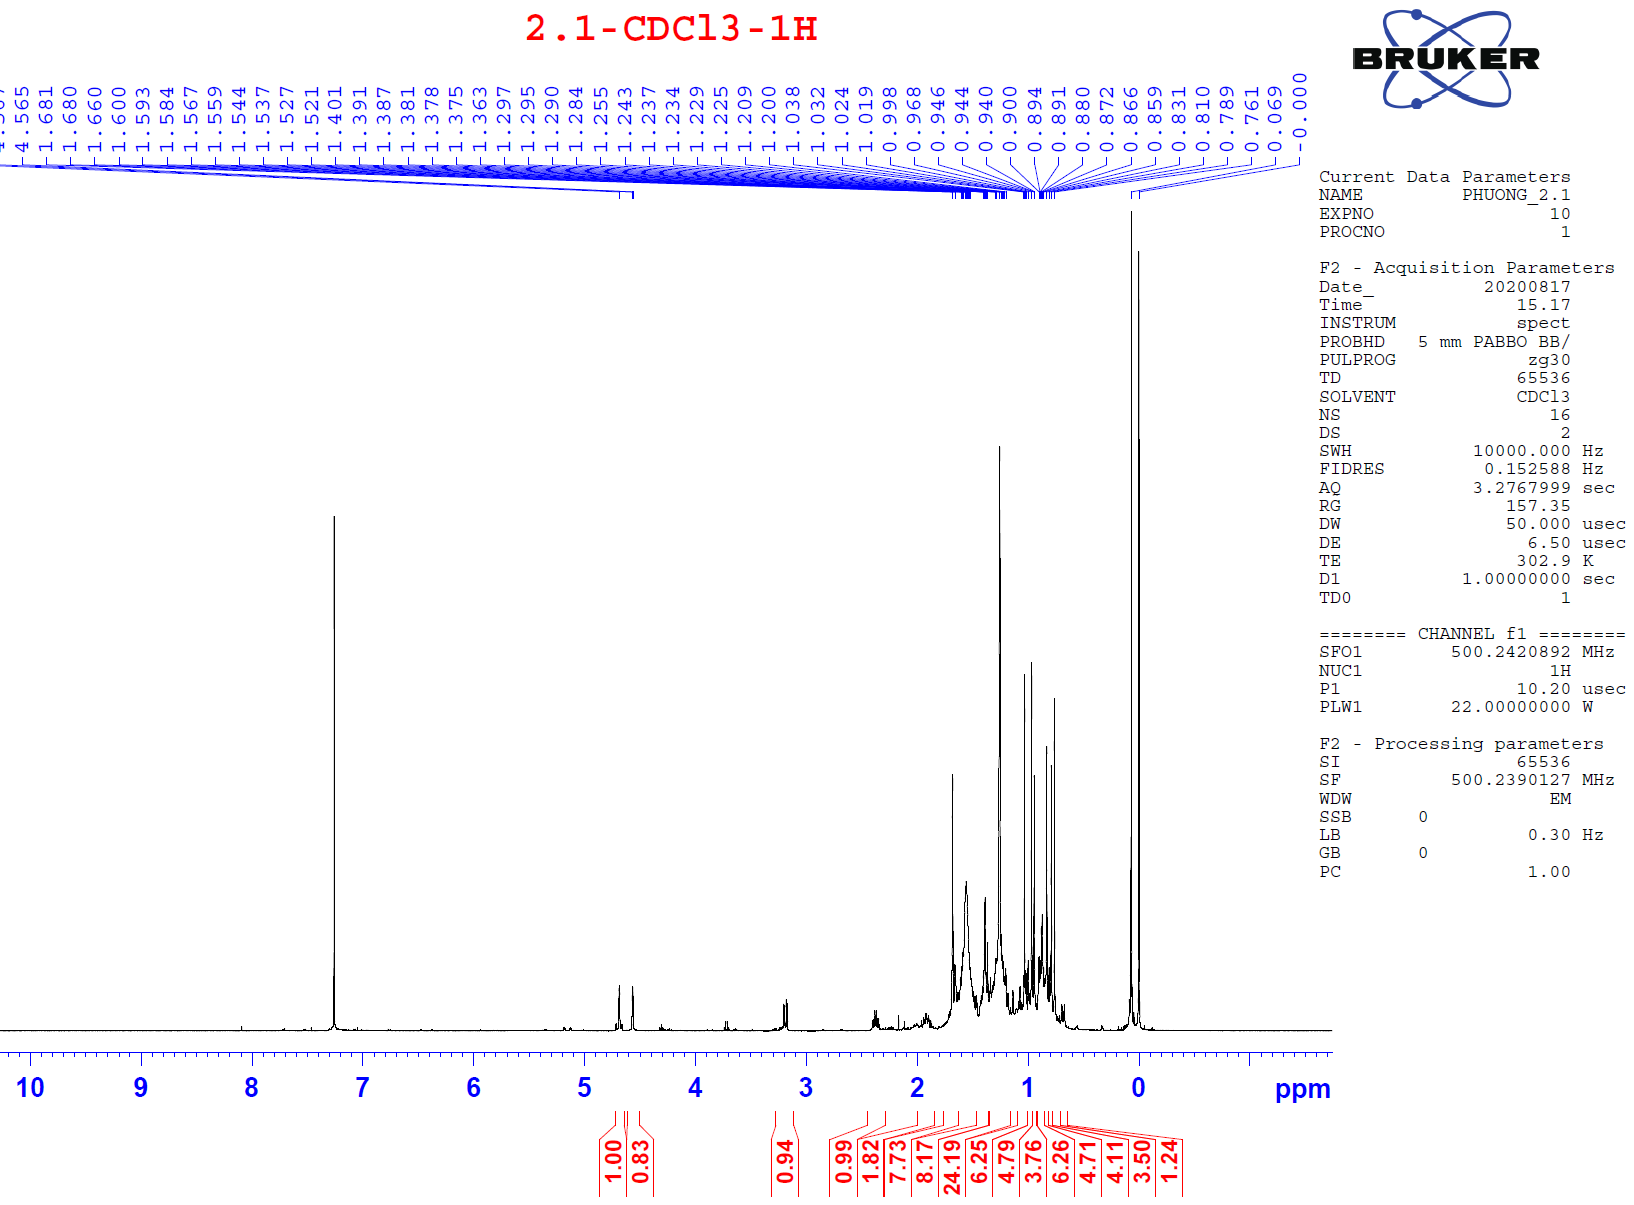


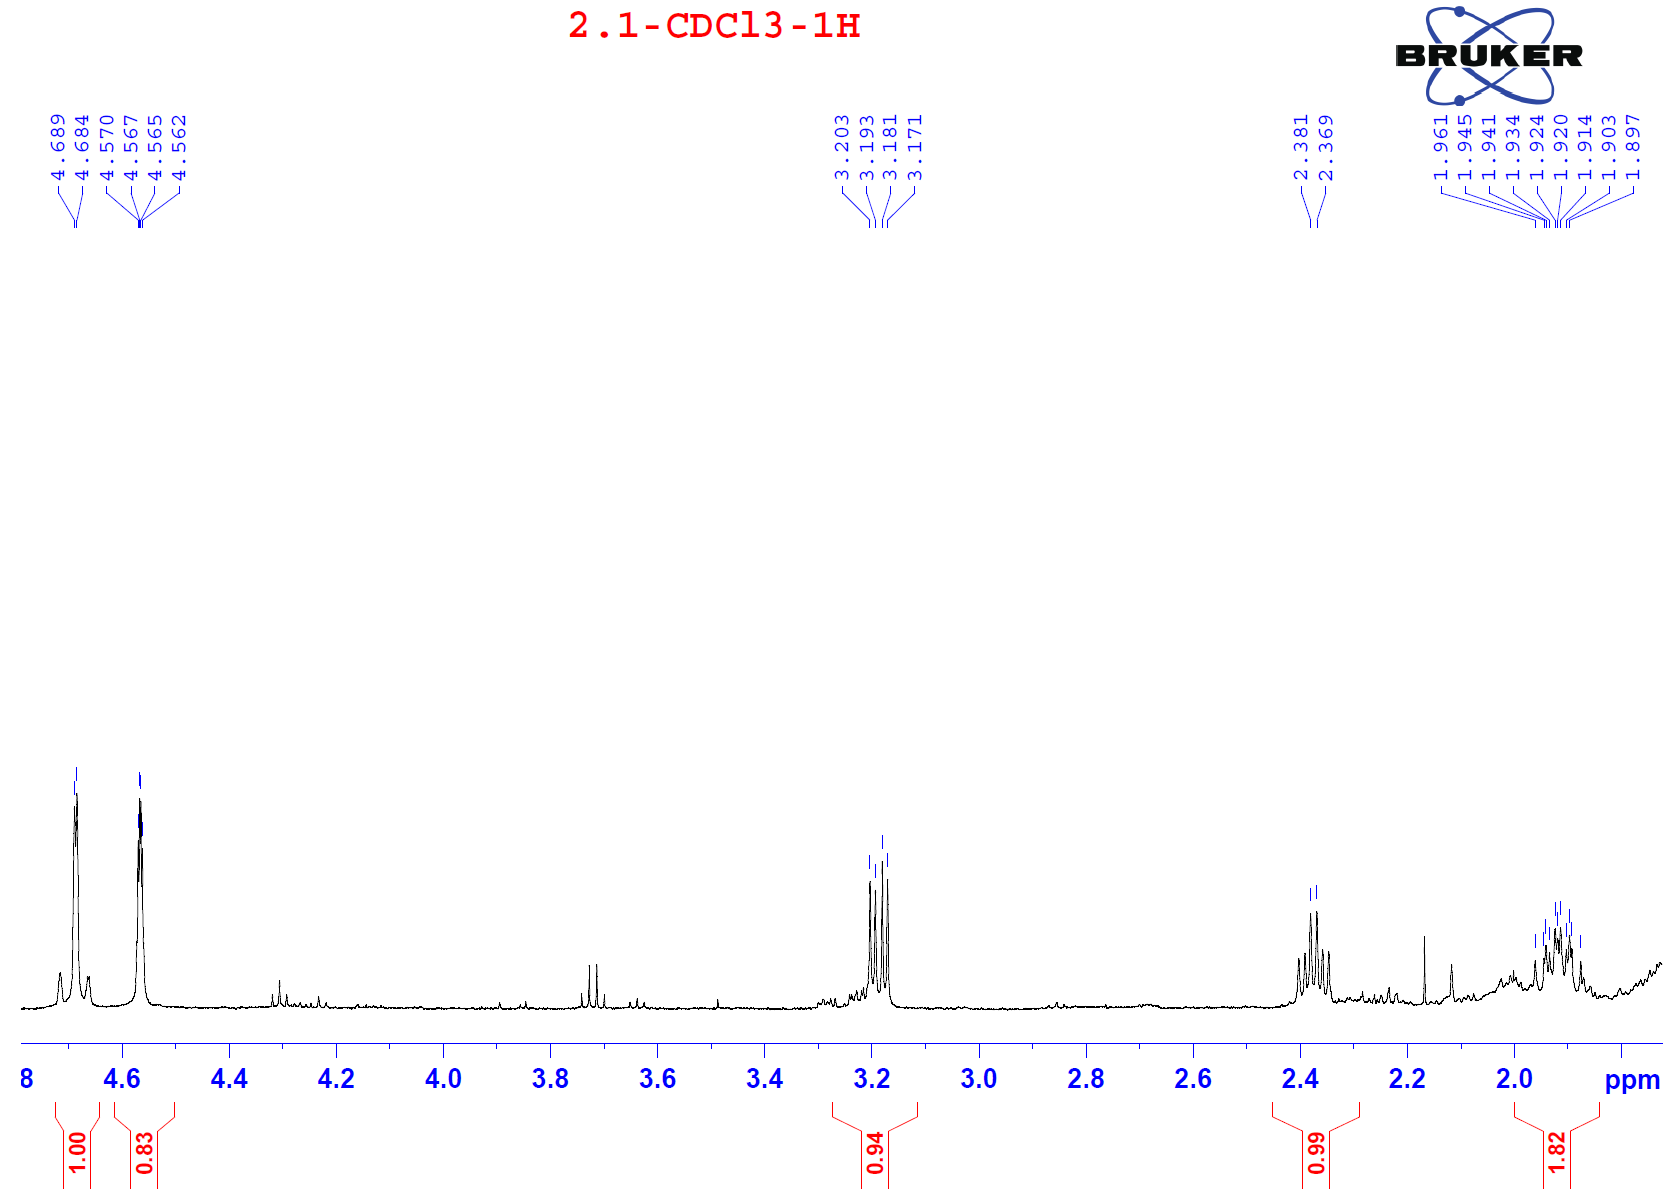


**Figure S2.1.** 1H-NMR expand of lupeol


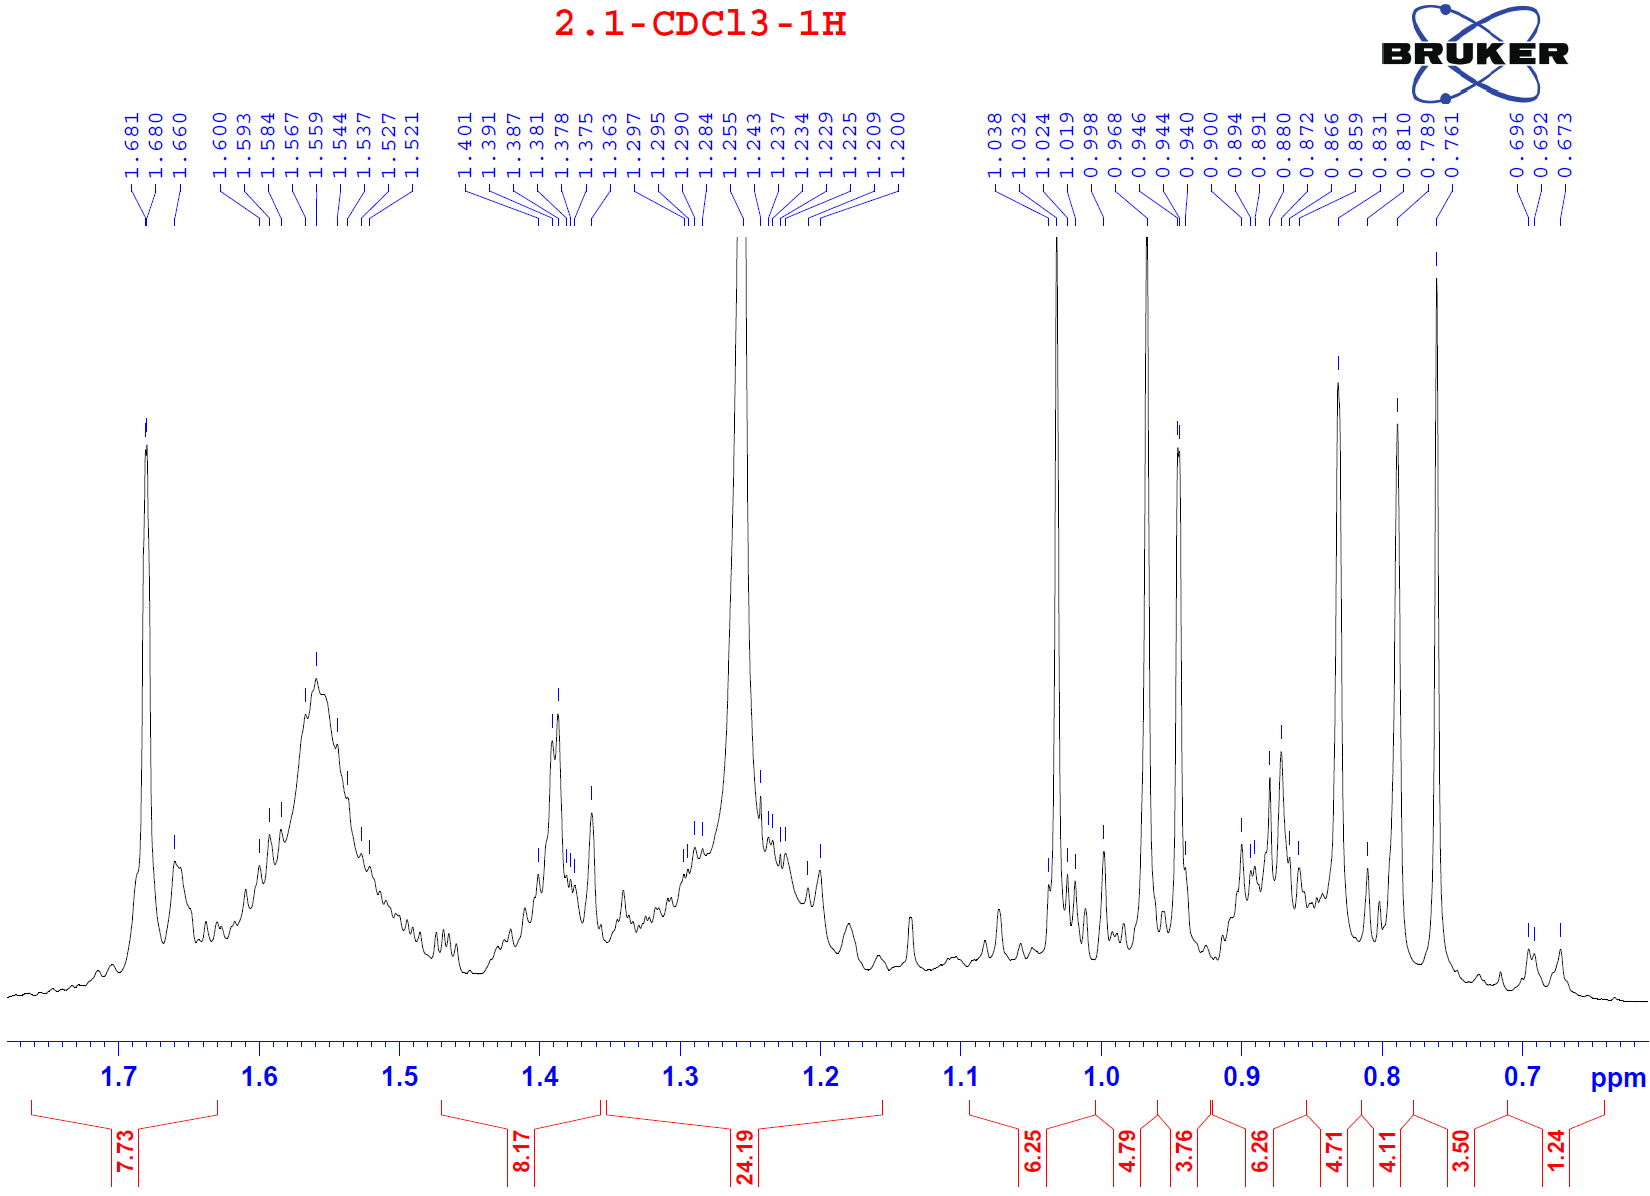


**Figure S2.2** 1H-NMR expand of lupeol


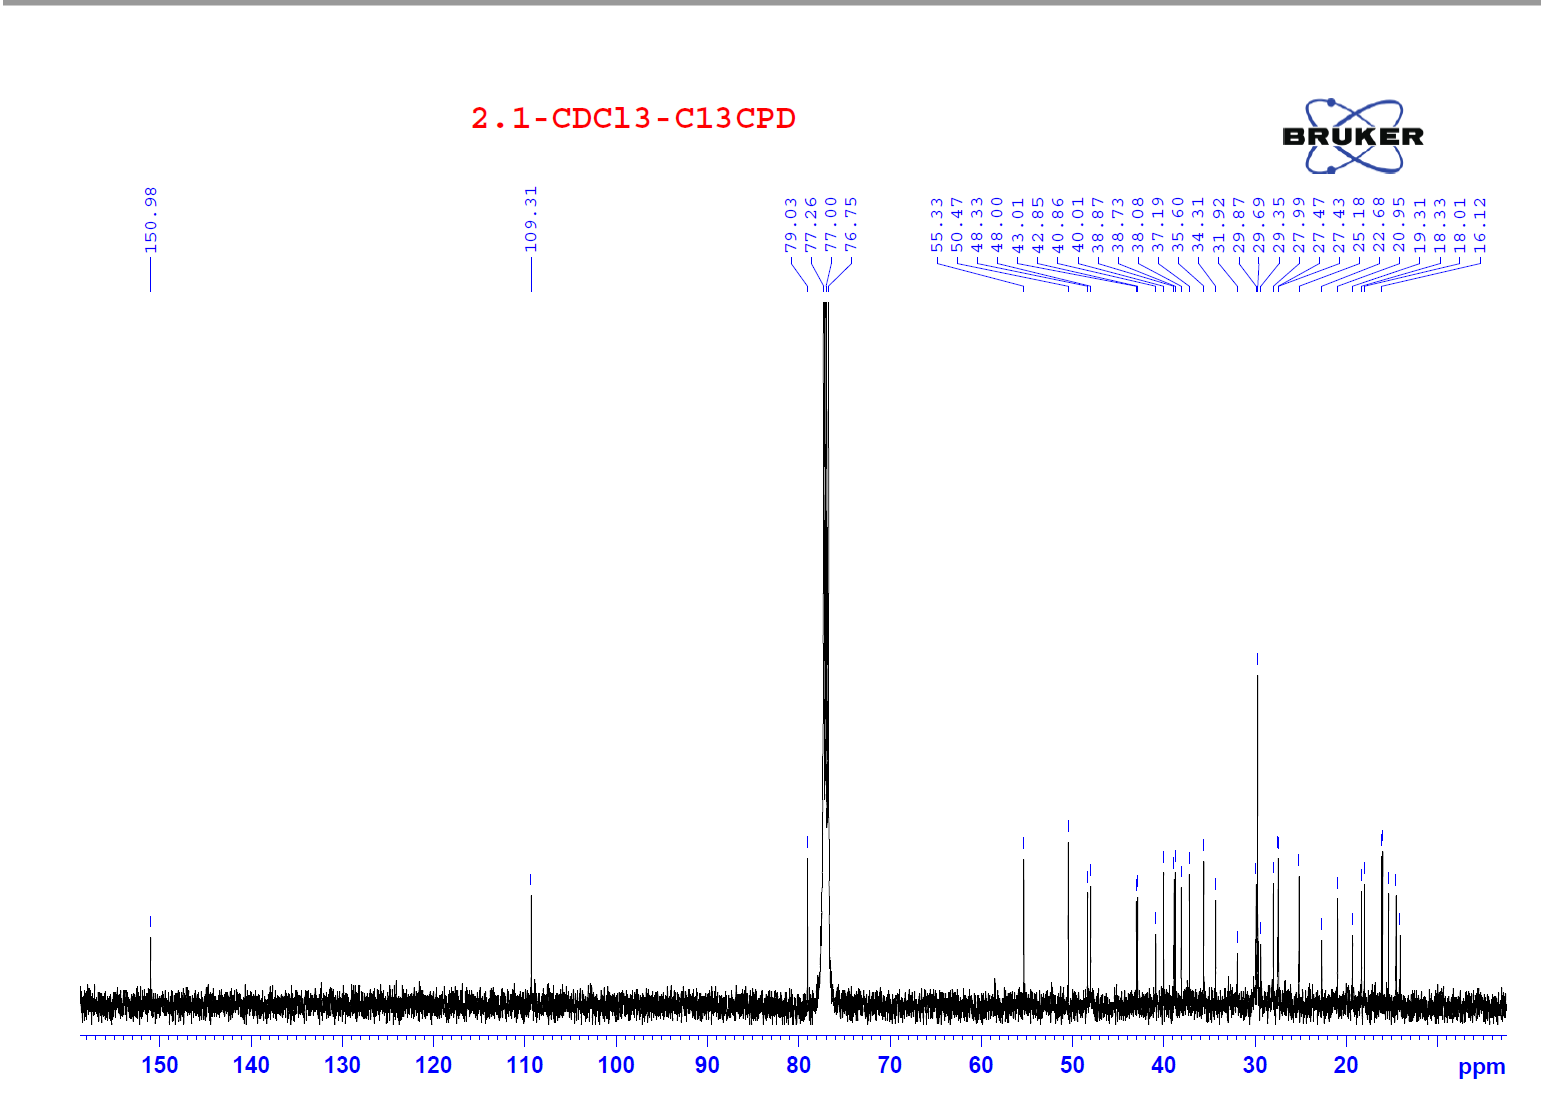


**Figure S2.3** 13C-NMR of lupeol

- In addition to measuring the 1D-NMR spectrum of compound 2.1, to accurately determine the structure of compound 2.1 we also measure both HSQC and HMBC spectra of compound 2.1.


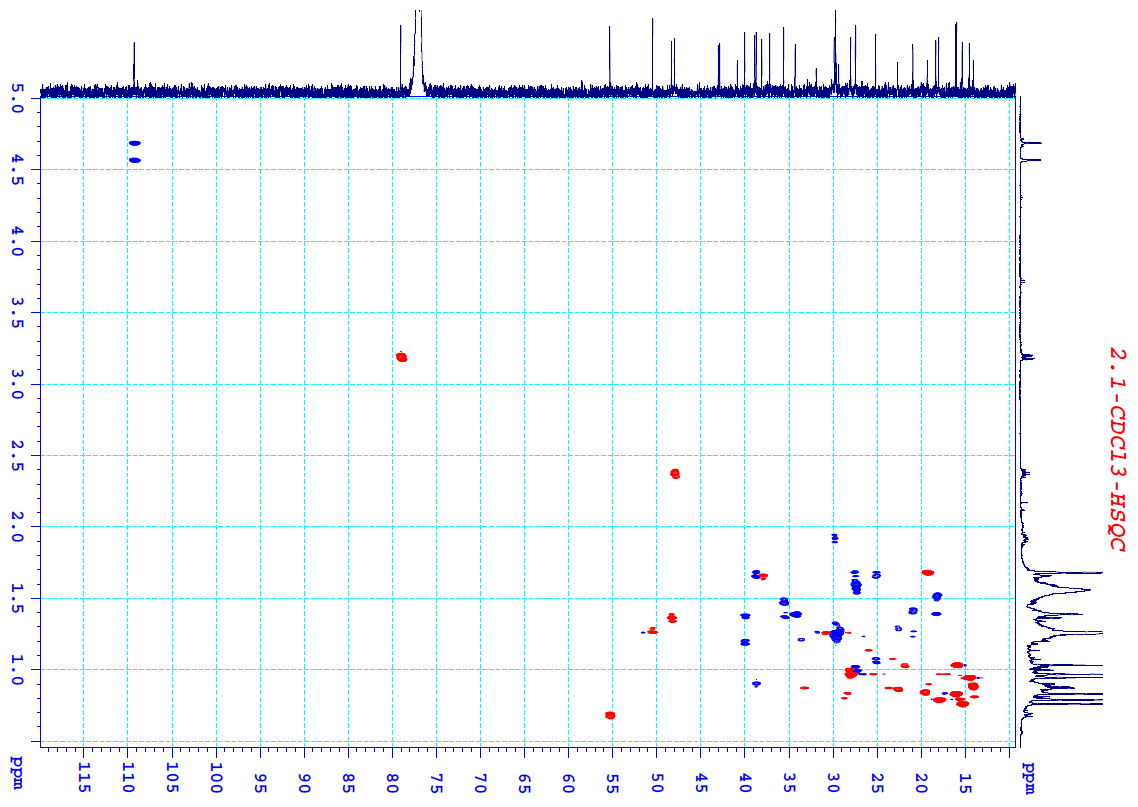


**Figure S2.4** HSQC spectrum of lupeol


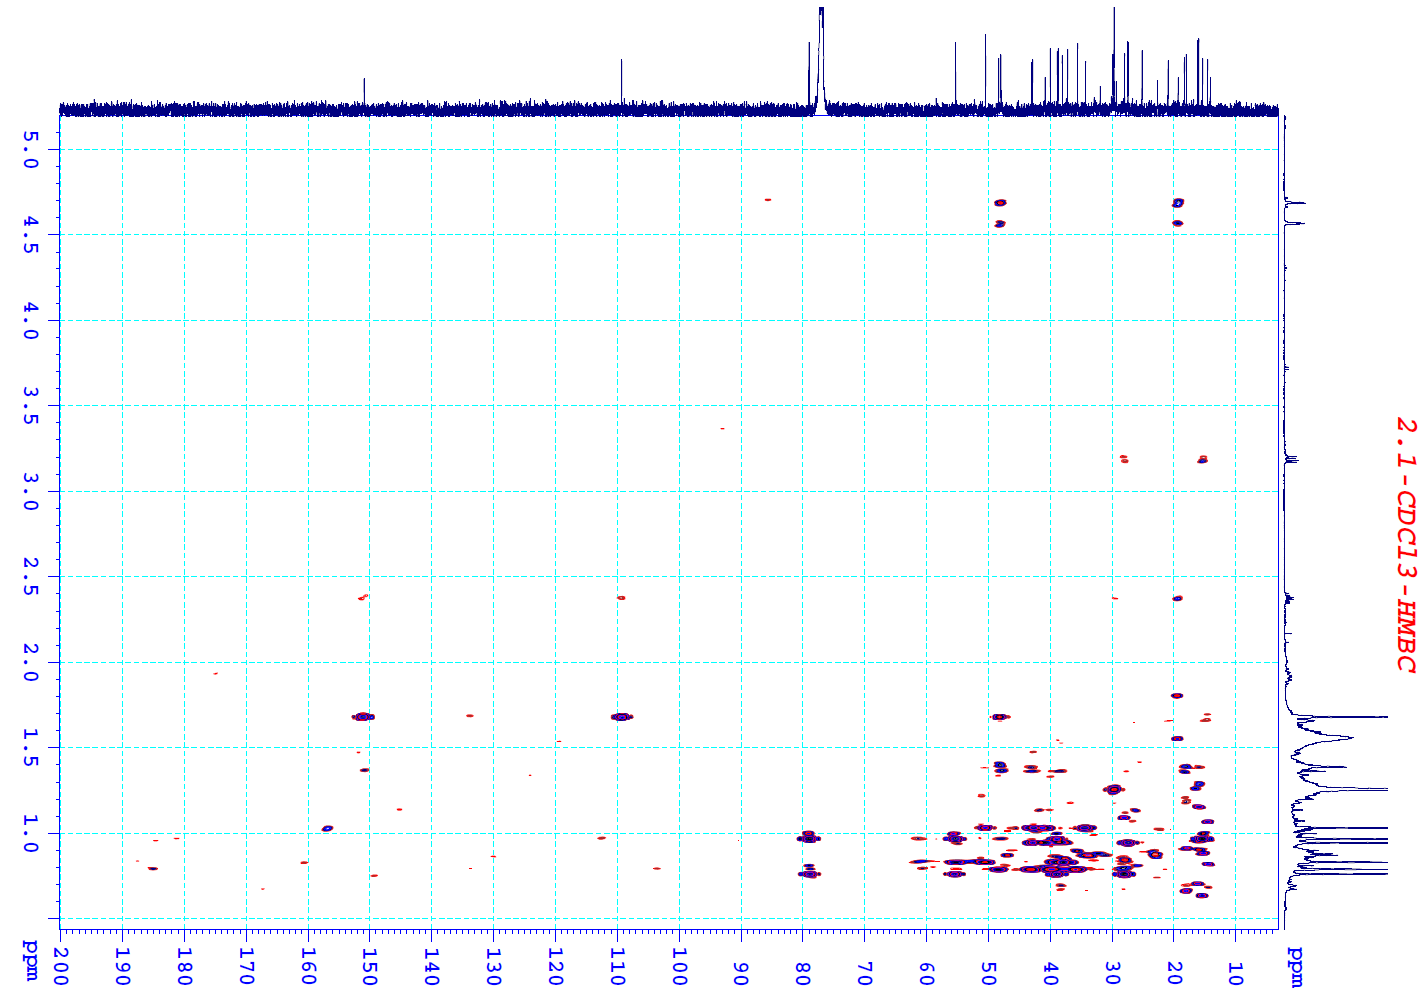


**Figure S2.5** HMBC spectrum of lupeol


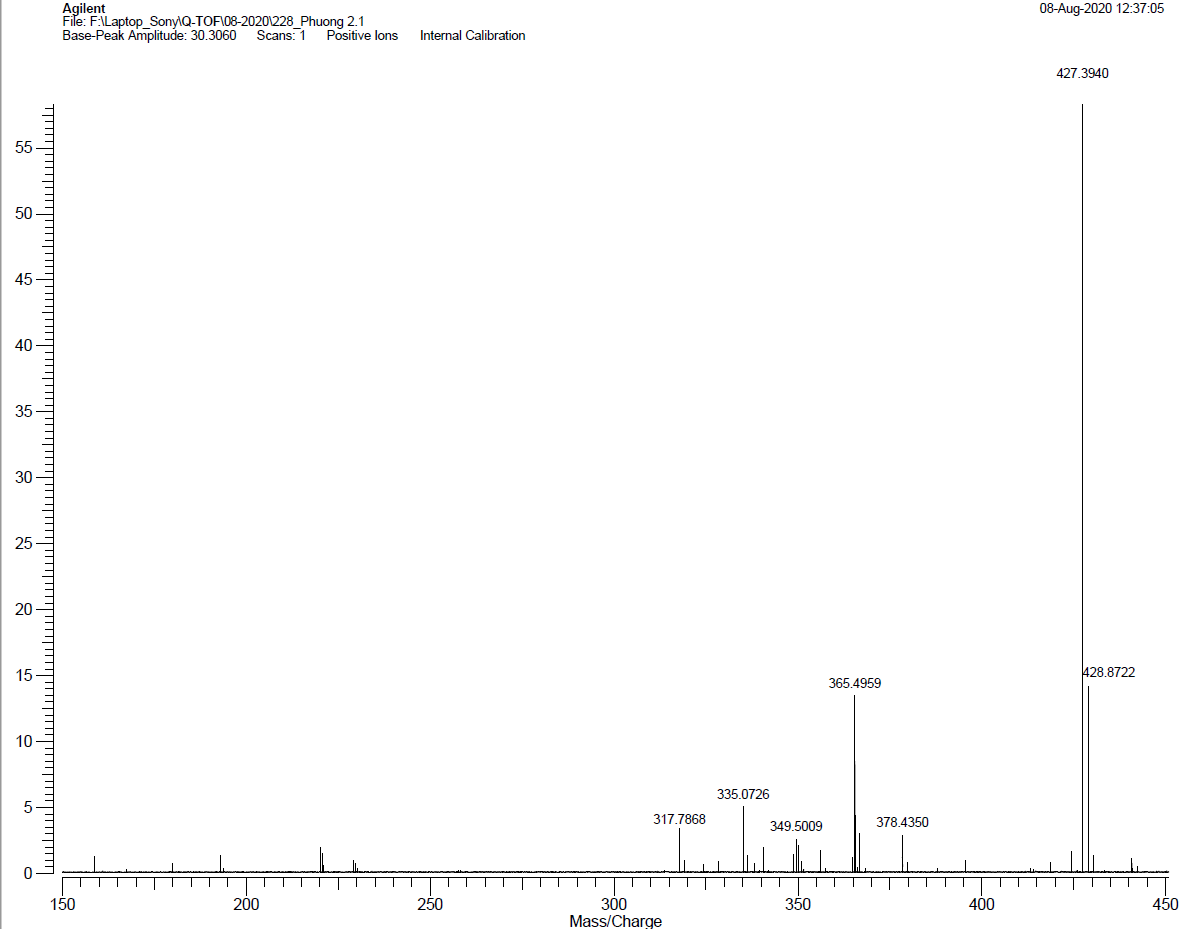


**Figure S3.** High resolution positive MS of lupeol from *C. nutans.*
